# Supplementary material for: Changes in the Suitable Habitats of Three Endemic Fishes to Climate Change in Tibet
Source: MDPI journal article supplement (doi:10.3390/biology11121808), 2022-12-13
Supplement: s1 [file s1]

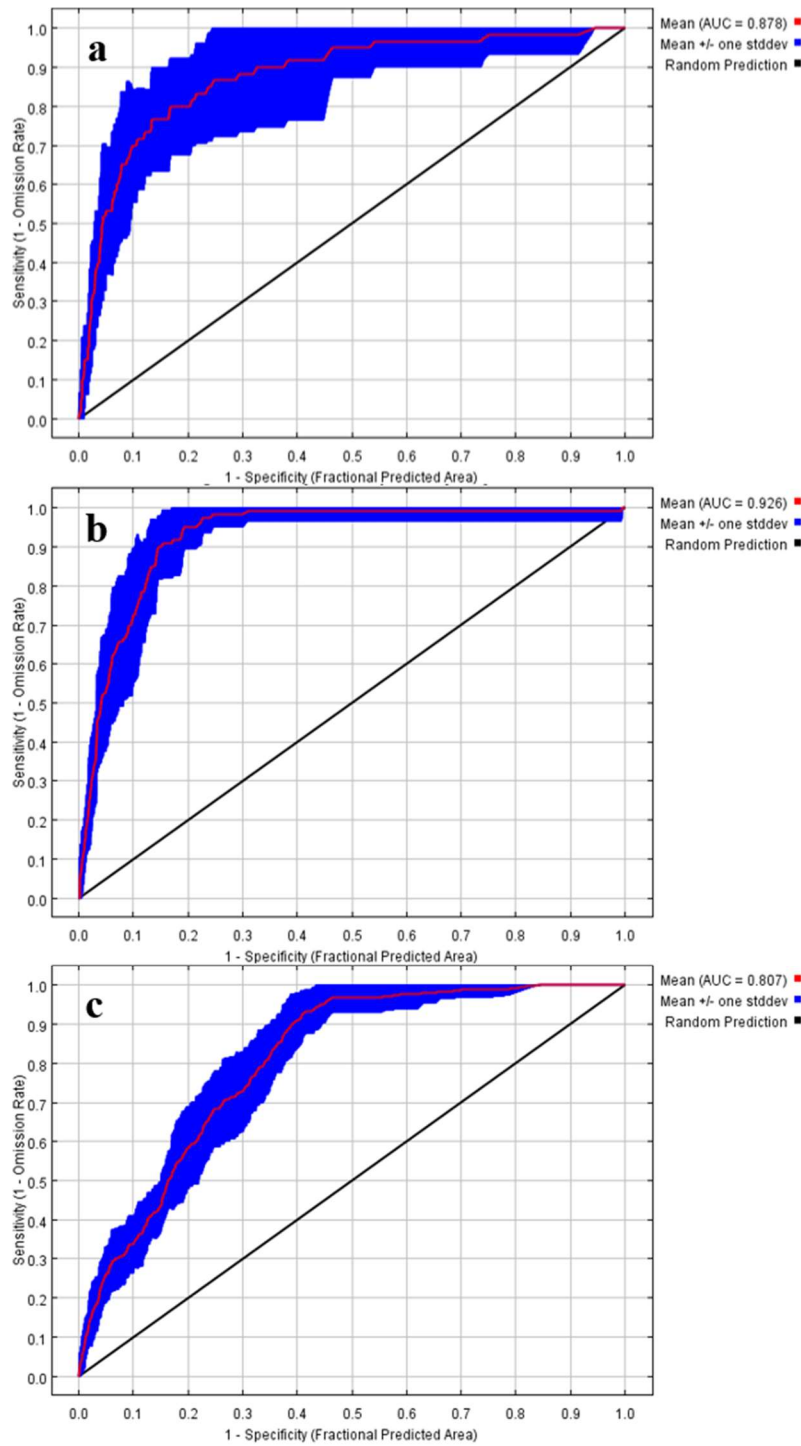

**Figure S1.** Receiver operating characteristic (ROC) curve verification of distribution of *Glyptosternon maculatum* (a), *Oxygymnocypris stewartii* (b) and *Gymnocypris selincuoensis* (c) under different climate scenarios predicted by the Maxent model.
