# Supplementary material for: Changes in the Suitable Habitats of Three Endemic Fishes to Climate Change in Tibet
Source: MDPI journal article supplement (doi:10.3390/biology11121808), 2022-12-13
Supplement: s1 [file s1]

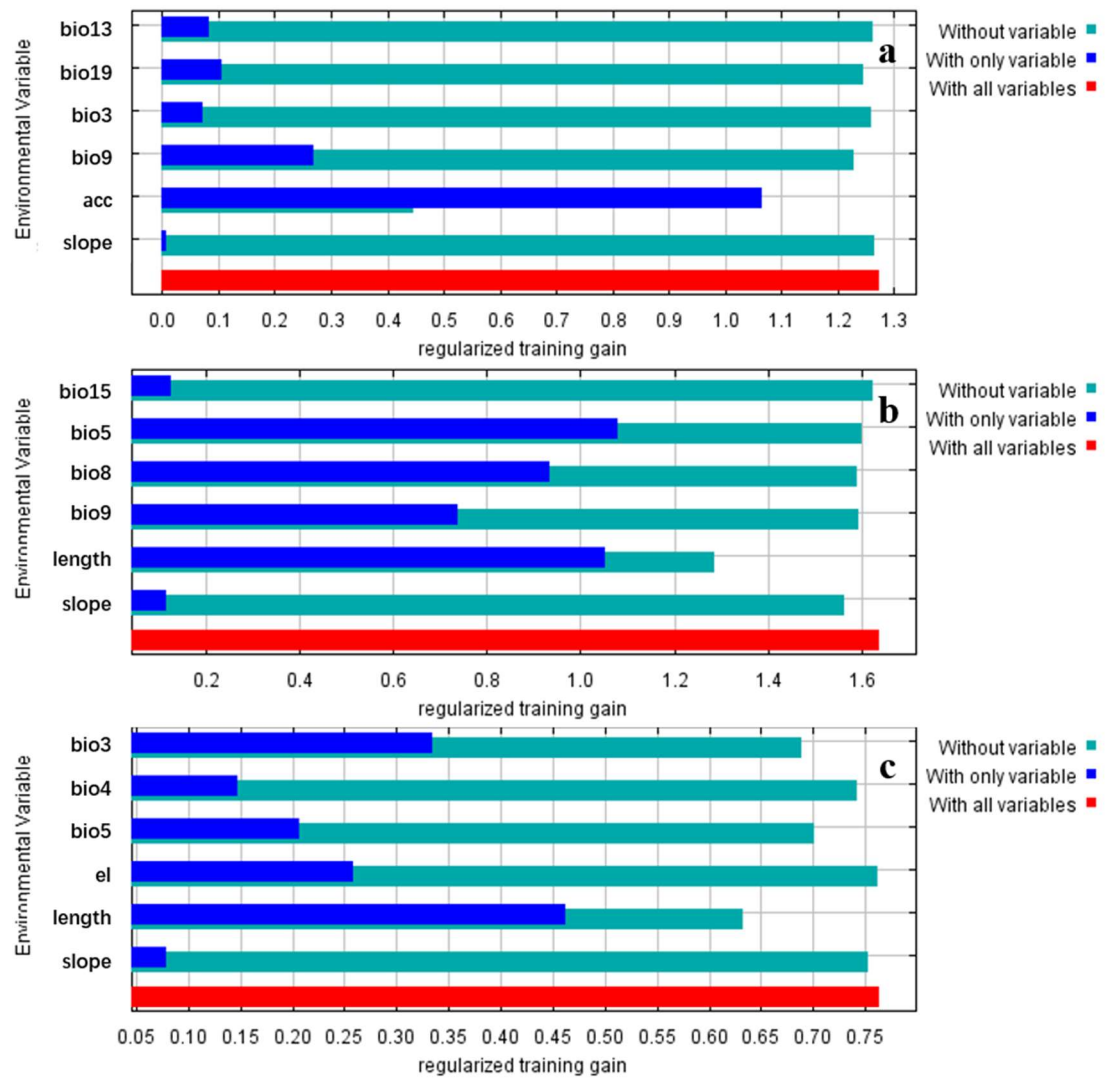

**Figure S2.** Results of Jackknife tests of regularized training gain for the contribution of variables for *G. maculatum* (a), *O. stewartii* (b) and *G. selincuoensis* (c) under different climate scenarios predicted by the Maxent model.
